# Supplementary material
Source: PubMed Central journal article supplement (PMC5753596)
Supplement: NIHMS929068-supplement-sup2.pdf [file NIHMS929068-supplement-sup2.pdf]

**Supplement 2 to the article:** Development and Validation of the Patient Experience with Treatment and Self-Management (PETS): A Patient-Reported Measure of Treatment Burden

**Journal:** Quality of Life Research

**Authors:** David T. Eton,\* Kathleen J. Yost, Jin-shei Lai, Jennifer L. Ridgeway, Jason S. Egginton, Jordan K. Rosedahl, Mark Linzer, Deborah H. Boehm, Azra Thakur, Sara Poplau, Laura Odell, Victor M. Montori, Carl R. May, Roger T. Anderson

**\*Corresponding author:** Division of Health Care Policy & Research, Department of Health Sciences Research, Mayo Clinic, 200 First Street SW, Rochester, MN USA 55905.  
Tel.: +507-293-1353; Fax: +507-284-1516. Email address: [eton.david@mayo.edu](mailto:eton.david@mayo.edu) (D.T. Eton).

**Supplement 2. Item diagnostic results**

| <b><u>DOMAIN / ITEM</u></b>                                                                                         | <b><u>RETAIN, REMOVE,<br/>or SET ASIDE?<sup>1</sup></u></b>                |
|---------------------------------------------------------------------------------------------------------------------|----------------------------------------------------------------------------|
| <b><i>Learning about health conditions &amp; care</i></b>                                                           |                                                                            |
| How easy/difficult has it been to ...                                                                               |                                                                            |
| 1 learn about your health problem(s)?                                                                               | Retain                                                                     |
| 2 learn what foods you should eat to stay healthy?                                                                  | Retain                                                                     |
| 3 find information on the medications that you have to take?                                                        | Retain                                                                     |
| <u>Response scale:</u> very easy, easy, neither easy nor difficult, difficult, very difficult, does not apply to me |                                                                            |
| <b><i>Medications</i></b>                                                                                           |                                                                            |
| How much of a problem has it been for you to...                                                                     |                                                                            |
| 4 organize your medicines?                                                                                          | Retain                                                                     |
| 5 take more than one medicine every day?                                                                            | Retain                                                                     |
| 6 take your medicines several times each day?                                                                       | Retain                                                                     |
| 7 refill your medicines?                                                                                            | Retain                                                                     |
| 8 adjust your medicines (including the amount, type, or time when you take it)?                                     | Retain                                                                     |
| <u>Response scale:</u> not at all, a little, somewhat, quite a bit, very much                                       |                                                                            |
| <b><i>Difficulty with taking medications</i></b>                                                                    |                                                                            |
| How easy/difficult has it been to ...                                                                               |                                                                            |
| 9 take your medicines as directed?                                                                                  | Retain                                                                     |
| 10 plan your meals around your medicine schedule?                                                                   | Remove (high correlation [ $\rho=0.85$ ] and content overlap with item 11) |
| 11 plan your daily activities around your medicine schedule?                                                        | Retain                                                                     |
| 12 prepare your medicines, such as cutting pills or mixing solutions?                                               | Remove (33% missing)                                                       |

|                                                                                                                     |                                                                               |
|---------------------------------------------------------------------------------------------------------------------|-------------------------------------------------------------------------------|
| <u>Response scale:</u> very easy, easy, neither easy nor difficult, difficult, very difficult, does not apply to me |                                                                               |
| How bothered have you been by...                                                                                    |                                                                               |
| 13 how much you have to rely on your medicine(s)?                                                                   | Retain                                                                        |
| 14 side effects of your medicine(s)?                                                                                | Retain                                                                        |
| <u>Response scale:</u> not at all, a little, somewhat, quite a bit, very much                                       |                                                                               |
| <b><u>Medical appointments</u></b>                                                                                  |                                                                               |
| How much of a problem has it been for you to...                                                                     |                                                                               |
| 15 make or keep your medical appointments?                                                                          | Retain                                                                        |
| 16 schedule and keep track of your medical appointments?                                                            | Retain                                                                        |
| 17 make or keep appointments with <u>different</u> healthcare providers?                                            | Retain                                                                        |
| <u>Response scale:</u> not at all, a little, somewhat, quite a bit, very much                                       |                                                                               |
| How much do you agree/disagree w/ following?                                                                        |                                                                               |
| 18 Difficult for me to get to my appointments because I am too busy with other things                               | Set aside (inter-correlations with items 15-17 are low, $\rho$ s=0.27 – 0.33) |
| 19 Difficult for me to get to my appointments because I am too tired                                                | Set aside (inter-correlations with items 15-17 are low, $\rho$ s=0.36 – 0.44) |
| 20 Difficult for me to get to my appointments because of trouble with transportation                                | Set aside (inter-correlations with items 15-17 are low, $\rho$ s=0.29 – 0.33) |
| <u>Response scale:</u> strongly agree, agree, disagree, strongly disagree                                           |                                                                               |
| <b><u>Monitoring health</u></b>                                                                                     |                                                                               |
| How much of a problem has it been for you to...                                                                     |                                                                               |
| 21 monitor your health behaviors, e.g., tracking exercise, foods you eat, or medicines you take?                    | Retain                                                                        |
| 22 monitor your health condition, e.g., weighing yourself, checking blood pressure, or checking blood sugar?        | Retain                                                                        |
| <u>Response scale:</u> not at all, a little, somewhat, quite a bit, very much                                       |                                                                               |
| <b><u>Exercise or Physical Therapy<sup>2</sup></u></b>                                                              |                                                                               |
| How much do you agree/disagree w/ following?                                                                        |                                                                               |
| 24 Spend too much time following my exercise or physical therapy plan                                               | Set aside (57% missing, mostly due to screening out of question)              |
| 25 Difficult for me to follow my exercise or physical therapy plan because of physical pain or discomfort           | Set aside (58% missing, mostly due to screening out of question)              |
| 26 Difficult for me to get motivated to exercise or do physical therapy                                             | Set aside (58% missing, mostly due to screening out of question)              |
| 27 Difficult for me to follow my exercise or physical therapy plan because I do not have                            | Set aside (58% missing, mostly due to screening out of question)              |

|                                                                                                                                     |                                                                                                                                                                                                                                                       |
|-------------------------------------------------------------------------------------------------------------------------------------|-------------------------------------------------------------------------------------------------------------------------------------------------------------------------------------------------------------------------------------------------------|
| someone to do it with                                                                                                               |                                                                                                                                                                                                                                                       |
| Response scale: strongly agree, agree, disagree, strongly disagree                                                                  |                                                                                                                                                                                                                                                       |
| <b><i>Diet<sup>3</sup></i></b>                                                                                                      |                                                                                                                                                                                                                                                       |
| How much do you agree/disagree w/ following?                                                                                        |                                                                                                                                                                                                                                                       |
| 29 Diet plan requires me to give up too many foods that I like.                                                                     | Set aside (60% missing, mostly due to screening out of question)                                                                                                                                                                                      |
| 30 Difficult for me to follow my diet plan because it is hard to find healthy foods                                                 | Set aside (61% missing, mostly due to screening out of question)                                                                                                                                                                                      |
| 31 Difficult for me to follow my diet plan because I crave less healthy foods                                                       | Set aside (61% missing, mostly due to screening out of question)                                                                                                                                                                                      |
| Response scale: strongly agree, agree, disagree, strongly disagree                                                                  |                                                                                                                                                                                                                                                       |
| <b><i>Medical equipment<sup>4</sup></i></b>                                                                                         |                                                                                                                                                                                                                                                       |
| How easy/difficult has it been to ...                                                                                               |                                                                                                                                                                                                                                                       |
| 33 use your medical equipment or device?                                                                                            | Set aside (46% missing, mostly due to screening out of question)                                                                                                                                                                                      |
| 34 keep your medical equipment or device working correctly?                                                                         | Set aside (46% missing, mostly due to screening out of question)                                                                                                                                                                                      |
| Response scale: very easy, easy, neither easy nor difficult, difficult, very difficult                                              |                                                                                                                                                                                                                                                       |
| <b><i>Interpersonal challenges</i></b>                                                                                              |                                                                                                                                                                                                                                                       |
| How bothered have you been by...                                                                                                    |                                                                                                                                                                                                                                                       |
| 35 feeling dependent on others for your healthcare needs?                                                                           | Retain                                                                                                                                                                                                                                                |
| 36 others reminding you to do things for your health like take your medicine, watch what you eat, or schedule medical appointments? | Retain                                                                                                                                                                                                                                                |
| 37 your healthcare needs creating tension in your relationships with others                                                         | Retain                                                                                                                                                                                                                                                |
| 38 others not understanding your health situation                                                                                   | Retain                                                                                                                                                                                                                                                |
| Response scale: not at all, a little, somewhat, quite a bit, very much                                                              |                                                                                                                                                                                                                                                       |
| <b><i>Medical &amp; healthcare expenses</i></b>                                                                                     |                                                                                                                                                                                                                                                       |
| How easy/difficult has it been for you to ...                                                                                       |                                                                                                                                                                                                                                                       |
| 39 fill out forms related to your medical expenses or insurance coverage?                                                           | Remove (item correlated about equally with items in two domains: <i>medical/healthcare expenses</i> [rhos = 0.55 to 0.68] and <i>confusion/concern about medical information</i> [rhos = 0.57 to 0.62]) – does not clearly fall into a single domain. |
| 40 plan for the future because of your medical expenses?                                                                            | Retain                                                                                                                                                                                                                                                |
| 41 pay for healthy foods?                                                                                                           | Retain                                                                                                                                                                                                                                                |
| 42 pay for all of your medical expenses?                                                                                            | Retain                                                                                                                                                                                                                                                |
| 43 pay for expenses related to exercise, like gym                                                                                   | Remove (34% missing)                                                                                                                                                                                                                                  |

|                                                                                                                     |                                                                                                        |
|---------------------------------------------------------------------------------------------------------------------|--------------------------------------------------------------------------------------------------------|
| memberships or exercise equipment?                                                                                  |                                                                                                        |
| 44 pay for your health insurance?                                                                                   | Remove (high correlation and content overlap with item 42 [ $\rho=0.80$ ] and item 45 [ $\rho=0.84$ ]) |
| 45 pay for your medicines?                                                                                          | Retain                                                                                                 |
| 46 understand what is and what is not covered by your health insurance?                                             | Retain                                                                                                 |
| <u>Response scale:</u> very easy, easy, neither easy nor difficult, difficult, very difficult, does not apply to me |                                                                                                        |
| <b><i>Confusion/concern about medical information</i></b>                                                           |                                                                                                        |
| How easy/difficult has it been for you to ...                                                                       |                                                                                                        |
| 47 keep up on changes in medical information related to your health problem(s) or illness(es)?                      | Remove (high correlation [ $\rho=0.86$ ] and content overlap with item 48)                             |
| 48 understand changes to your treatment plan?                                                                       | Retain                                                                                                 |
| 49 understand the reasons why you are taking some medicines?                                                        | Retain                                                                                                 |
| 50 find sources of medical information that you trust?                                                              | Retain                                                                                                 |
| 51 understand advice from different healthcare providers?                                                           | Retain                                                                                                 |
| 52 understand how to monitor your health problem(s) or illness(es)?                                                 | Remove (25% missing)                                                                                   |
| <u>Response scale:</u> very easy, easy, neither easy nor difficult, difficult, very difficult, does not apply to me |                                                                                                        |
| <b><i>Healthcare providers</i></b>                                                                                  |                                                                                                        |
| How much do you agree/disagree w/ following?                                                                        |                                                                                                        |
| 53 My healthcare provider(s) listens carefully to me                                                                | Remove (domain items do not conceptually fit with the treatment burden construct)                      |
| 54 It is easy for me to communicate with my healthcare provider(s)                                                  | Remove (domain items do not conceptually fit with the treatment burden construct)                      |
| 55 My healthcare provider(s) treats me with dignity and respect                                                     | Remove (domain items do not conceptually fit with the treatment burden construct)                      |
| 56 My healthcare provider(s) is up to date on my medical history                                                    | Remove (domain items do not conceptually fit with the treatment burden construct)                      |
| 57 My healthcare provider(s) spends enough time with me                                                             | Remove (domain items do not conceptually fit with the treatment burden construct)                      |
| 58 My healthcare provider(s) treats me as a whole person                                                            | Remove (domain items do not conceptually fit with the treatment burden construct)                      |
| 59 I have trust in my healthcare provider(s)                                                                        | Remove (domain items do not conceptually fit with the treatment burden construct)                      |
| <u>Response scale:</u> strongly agree, agree, disagree, strongly disagree                                           |                                                                                                        |
| <b><i>Difficulty with healthcare services</i></b>                                                                   |                                                                                                        |
| How much do you agree/disagree w/ following?                                                                        |                                                                                                        |
| 60 Have problems with different healthcare providers not communicating with each other                              | Retain                                                                                                 |

|                                                                                                 |                                                                            |
|-------------------------------------------------------------------------------------------------|----------------------------------------------------------------------------|
| about my medical care                                                                           |                                                                            |
| 61 Have to see too many different specialists for my health problem(s) or illness(es)           | Retain                                                                     |
| 62 Have problems filling out forms related to my healthcare                                     | Retain                                                                     |
| 63 Have problems getting appointments at times that are convenient for me                       | Retain                                                                     |
| 64 Have problems getting appointments with a specialist                                         | Retain                                                                     |
| 65 Have to wait too long at my medical appointments                                             | Retain                                                                     |
| 66 Have to wait too long at the pharmacy for my medicine                                        | Retain                                                                     |
| <u>Response scale:</u> strongly agree, agree, disagree, strongly disagree, does not apply to me |                                                                            |
| <b><i><u>Role and social activity limitations</u></i></b>                                       |                                                                            |
| How much has your <u>self-care</u> interfered with...                                           |                                                                            |
| 67 work (include work at home)?                                                                 | Retain                                                                     |
| 68 family responsibilities?                                                                     | Retain                                                                     |
| 69 daily activities?                                                                            | Retain                                                                     |
| 70 hobbies and leisure activities?                                                              | Retain                                                                     |
| 71 ability to spend time with family and friends?                                               | Retain                                                                     |
| 72 ability to travel for work or vacation?                                                      | Retain                                                                     |
| <u>Response scale:</u> not at all, a little, somewhat, quite a bit, very much                   |                                                                            |
| <b><i><u>Physical and mental exhaustion</u></i></b>                                             |                                                                            |
| How often did your <u>self-care</u> make you feel...                                            |                                                                            |
| 73 angry?                                                                                       | Retain                                                                     |
| 74 preoccupied?                                                                                 | Retain                                                                     |
| 75 depressed?                                                                                   | Retain                                                                     |
| 76 worn out?                                                                                    | Retain                                                                     |
| 77 frustrated?                                                                                  | Retain                                                                     |
| 78 overwhelmed?                                                                                 | Remove (high correlation [ $\rho=0.83$ ] and content overlap with item 77) |
| <u>Response scale:</u> never, rarely, sometimes, often, always                                  |                                                                            |

Note. <sup>1</sup>Removed items are permanently deleted from the measure. Set aside items (i.e., provisionally excluded items) require further analyses. <sup>2</sup>Screening question present for these items: “Has a doctor, nurse, physical therapist or other healthcare provider given you an exercise or physical therapy plan to follow?” (Y/N) If no then exercise/physical therapy questions are skipped. <sup>3</sup>Screening question present for these items: “Has a doctor, nurse, dietician or other healthcare provider given you a diet plan to follow?” (Y/N) If no then diet questions are skipped. <sup>4</sup>Screening question present for these items: “Do you currently use any medical equipment or devices (e.g., blood pressure cuffs, insulin pens, blood sugar monitors, breathing machines for sleep apnea, or asthma inhalers, among others?” (Y/N) If no then questions are skipped.
